# Supplementary material for: Enhanced capacitive properties of all-metal-oxide-nanoparticle-based asymmetric supercapacitors
Source: Royal Society of Chemistry journal article supplement (doi:10.1039/c9ra06066a), 2019-01-01
Supplement: c9ra06066a1.pdf [file c9ra06066a1.pdf]

## Electronic Supplementary Information

### Enhanced capacitive properties of all-metal-oxide-nanoparticles-based asymmetric supercapacitors

Sohyun Jin, Haein Lee and Sanggyu Yim\*

*Department of Chemistry, Kookmin University, Seoul 02707, South Korea*

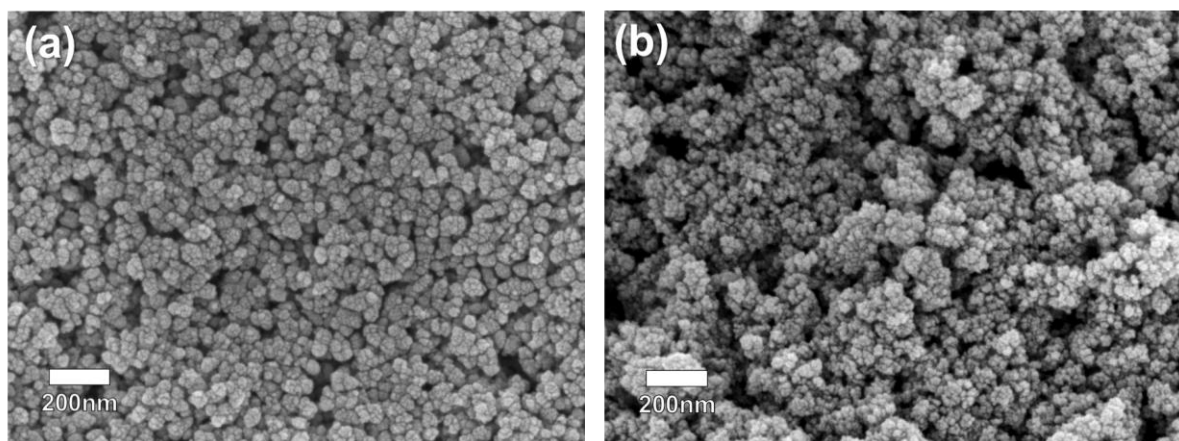

**Fig. S1.** FE-SEM images of TiO<sub>2</sub>-free (a) Fe<sub>2</sub>O<sub>3</sub> and (b) MnO<sub>2</sub> electrodes.

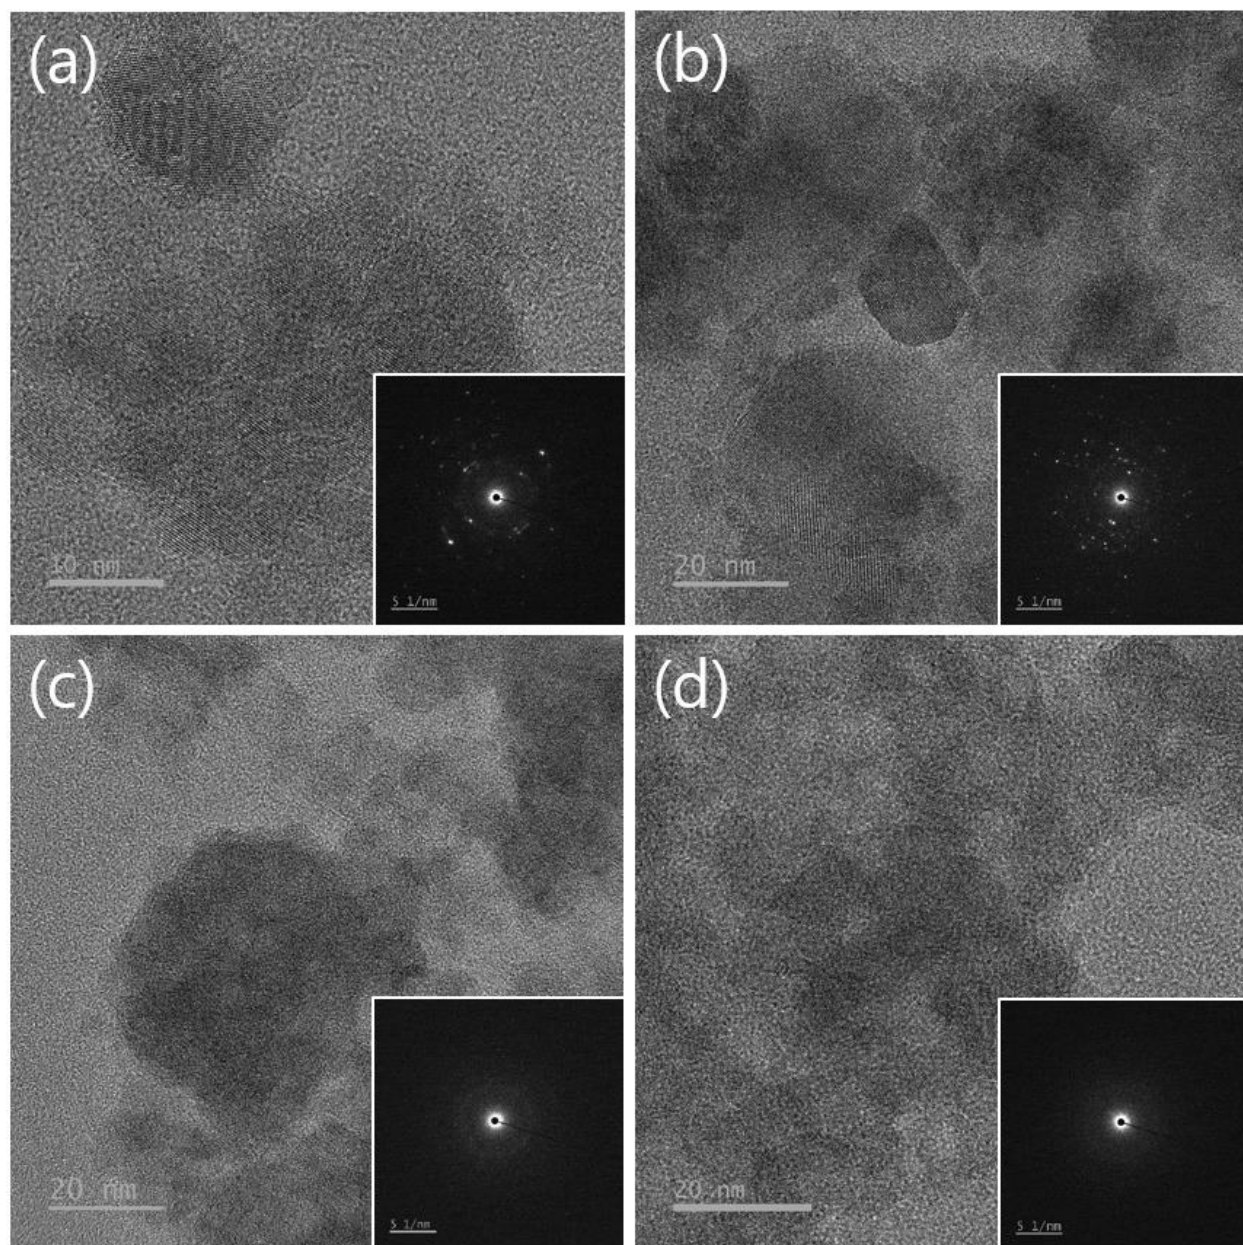

**Fig. S2.** TEM images and SAED patterns (inset) of the (a)  $\text{Fe}_2\text{O}_3$ , (b)  $\text{TiO}_2\text{-Fe}_2\text{O}_3$ , (c)  $\text{MnO}_2$  and (d)  $\text{TiO}_2\text{-MnO}_2$  NPs

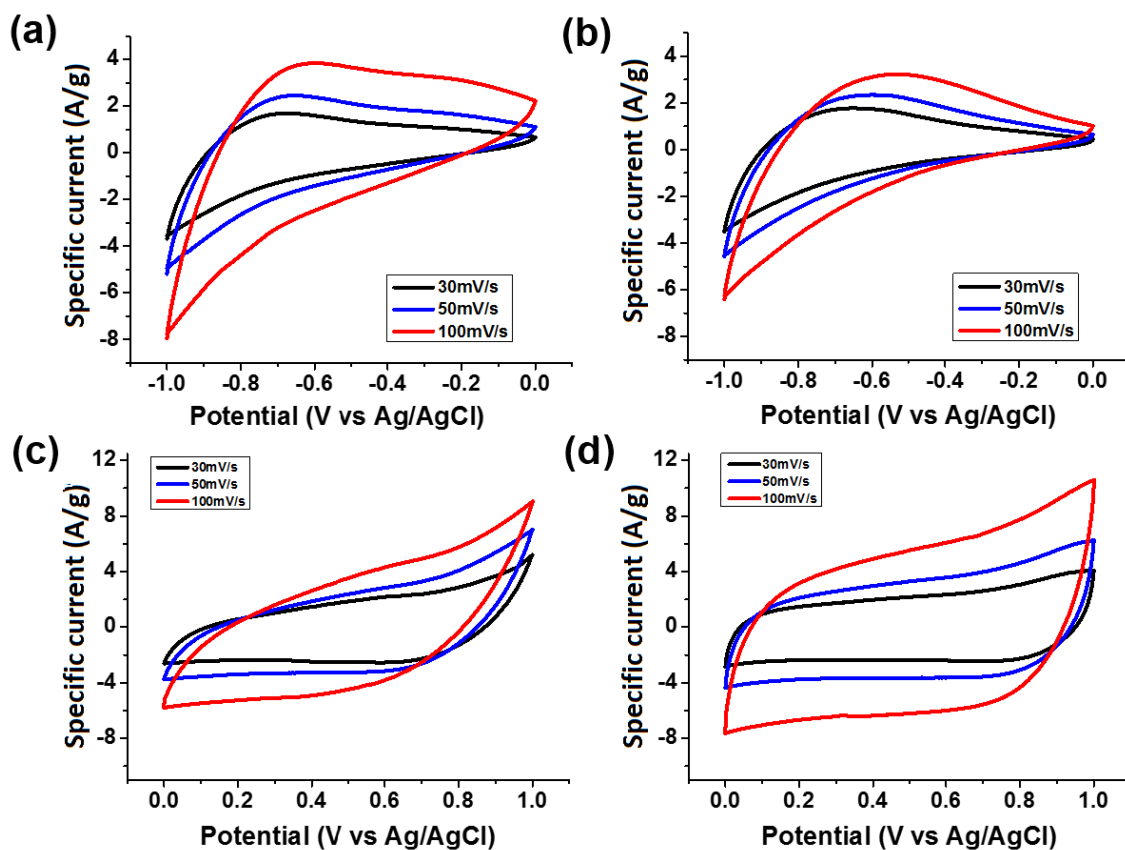

**Fig. S3.** Cyclic voltammograms of (a) TiO<sub>2</sub>-free-Fe<sub>2</sub>O<sub>3</sub>, (b) TiO<sub>2</sub>-Fe<sub>2</sub>O<sub>3</sub>, (c) TiO<sub>2</sub>-free-MnO<sub>2</sub> and (d) TiO<sub>2</sub>-MnO<sub>2</sub> half-cell electrodes at various scan rates..

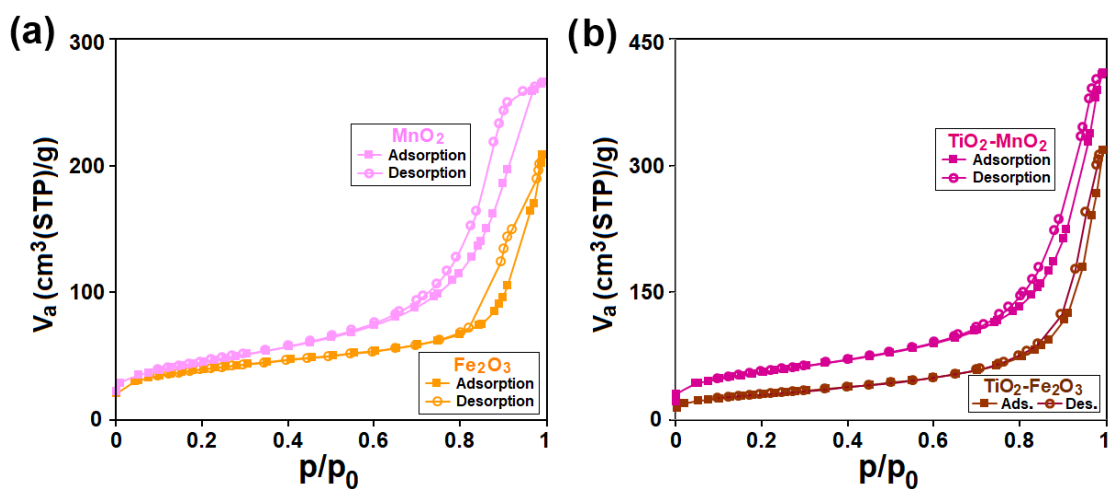

**Fig. S4.** BET N<sub>2</sub> adsorption-desorption isotherm plots of (a) MnO<sub>2</sub> and Fe<sub>2</sub>O<sub>3</sub> and (b) TiO<sub>2</sub>-MnO<sub>2</sub> and TiO<sub>2</sub>-Fe<sub>2</sub>O<sub>3</sub> NPs.

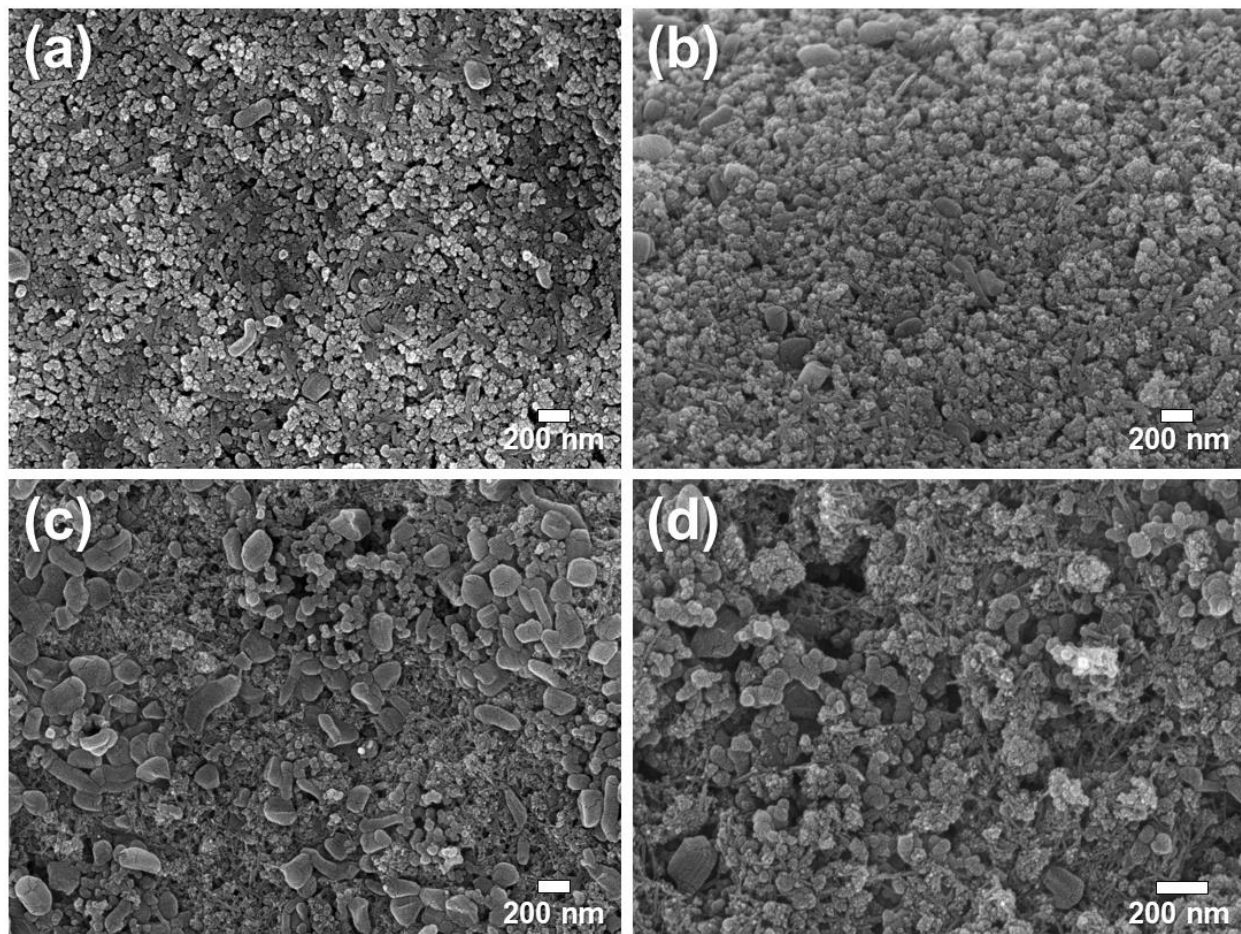

**Fig. S5.** FE-SEM images of (a, b)  $\text{TiO}_2\text{-Fe}_2\text{O}_3$  and (c, d)  $\text{TiO}_2\text{-MnO}_2$  half-cell electrodes in the  $\text{TiO}_2\text{-Fe}_2\text{O}_3//\text{TiO}_2\text{-MnO}_2$  ASC. The images (a) and (c) were taken before the GCD cycle test, and the images (b) and (d) were taken after 2000 GCD cycles.

| Scan rate<br>( $\text{mV s}^{-1}$ ) | TiO <sub>2</sub> -free-Fe <sub>2</sub> O <sub>3</sub> |                          | TiO <sub>2</sub> -Fe <sub>2</sub> O <sub>3</sub> |                          |
|-------------------------------------|-------------------------------------------------------|--------------------------|--------------------------------------------------|--------------------------|
|                                     | Surface element<br>(%)                                | Insertion element<br>(%) | Surface element<br>(%)                           | Insertion element<br>(%) |
| 30                                  | 41.9                                                  | 58.1                     | 22.0                                             | 78.0                     |
| 50                                  | 46.7                                                  | 53.4                     | 27.9                                             | 72.1                     |
| 100                                 | 57.6                                                  | 42.4                     | 40.7                                             | 59.3                     |

**Table S1.** Summary of the contribution of each capacitive element calculated by deconvolution analyses for the Fe<sub>2</sub>O<sub>3</sub>-NPs-based single electrodes with and without incorporation of TiO<sub>2</sub> NPs.

| Scan rate<br>( $\text{mV s}^{-1}$ ) | TiO <sub>2</sub> -free-MnO <sub>2</sub> |                          | TiO <sub>2</sub> -MnO <sub>2</sub> |                          |
|-------------------------------------|-----------------------------------------|--------------------------|------------------------------------|--------------------------|
|                                     | Surface element<br>(%)                  | Insertion element<br>(%) | Surface element<br>(%)             | Insertion element<br>(%) |
| 30                                  | 31.1                                    | 68.9                     | 49.3                               | 50.7                     |
| 50                                  | 39.7                                    | 60.3                     | 55.0                               | 45.0                     |
| 100                                 | 59.4                                    | 40.6                     | 67.6                               | 32.4                     |

**Table S2.** Summary of the contribution of each capacitive element calculated by deconvolution analyses for the MnO<sub>2</sub>-NPs-based single electrodes with and without incorporation of TiO<sub>2</sub> NPs.

| Scan rate<br>(mV s <sup>-1</sup> ) | Specific capacitance (F g <sup>-1</sup> )                                                                            |                                                                                          |                                                                                                         |
|------------------------------------|----------------------------------------------------------------------------------------------------------------------|------------------------------------------------------------------------------------------|---------------------------------------------------------------------------------------------------------|
|                                    | TiO <sub>2</sub> -Fe <sub>2</sub> O <sub>3</sub> //<br>TiO <sub>2</sub> -Fe <sub>2</sub> O <sub>3</sub><br>symmetric | TiO <sub>2</sub> -MnO <sub>2</sub> //<br>TiO <sub>2</sub> -MnO <sub>2</sub><br>symmetric | TiO <sub>2</sub> -Fe <sub>2</sub> O <sub>3</sub> //<br>TiO <sub>2</sub> -MnO <sub>2</sub><br>asymmetric |
| 10                                 | 46.9                                                                                                                 | 73.7                                                                                     | 72.7                                                                                                    |
| 30                                 | 35.5                                                                                                                 | 61.4                                                                                     | 58.5                                                                                                    |
| 50                                 | 29.9                                                                                                                 | 54.9                                                                                     | 52.8                                                                                                    |
| 100                                | 24.3                                                                                                                 | 45.8                                                                                     | 45.6                                                                                                    |

**Table S3.** The  $C_{sp}$  values obtained from CV analyses for the TiO<sub>2</sub>-Fe<sub>2</sub>O<sub>3</sub>- and TiO<sub>2</sub>-MnO<sub>2</sub>-NPs-based symmetric and asymmetric devices at various scan rates.

| Specific current<br>(A/g) | Specific capacitance (F/g)                                                                                           |                                                                                          |                                                                                                         |
|---------------------------|----------------------------------------------------------------------------------------------------------------------|------------------------------------------------------------------------------------------|---------------------------------------------------------------------------------------------------------|
|                           | TiO <sub>2</sub> -Fe <sub>2</sub> O <sub>3</sub> //<br>TiO <sub>2</sub> -Fe <sub>2</sub> O <sub>3</sub><br>symmetric | TiO <sub>2</sub> -MnO <sub>2</sub> //<br>TiO <sub>2</sub> -MnO <sub>2</sub><br>symmetric | TiO <sub>2</sub> -Fe <sub>2</sub> O <sub>3</sub> //<br>TiO <sub>2</sub> -MnO <sub>2</sub><br>asymmetric |
| 1                         | 12.8                                                                                                                 | 53.5                                                                                     | 87.5                                                                                                    |
| 2                         | 10.3                                                                                                                 | 43.2                                                                                     | 77.7                                                                                                    |
| 3                         | 3.5                                                                                                                  |                                                                                          |                                                                                                         |
| 5                         |                                                                                                                      | 31.6                                                                                     | 60.6                                                                                                    |

**Table S4.** The  $C_{sp}$  values obtained from GCD analyses for the TiO<sub>2</sub>-Fe<sub>2</sub>O<sub>3</sub>- and TiO<sub>2</sub>-MnO<sub>2</sub>-NPs-based symmetric and asymmetric devices at various current densities.
